# Supplementary material for: High-throughput neutralization assay for multiple flaviviruses based on single-round infectious particles using dengue virus type 1 reporter replicon
Source: PubMed Central journal article supplement (PMC6226426; doi:10.1038/s41598-018-34865-y), 2018-11-09
Supplement: 41598_2018_34865_MOESM1_ESM.pdf [file 41598_2018_34865_MOESM1_ESM.pdf]

**High-throughput neutralization assay for multiple flaviviruses based on single-round infectious particles using dengue virus type 1 reporter replicon**

Mami Matsuda<sup>1</sup>, Atsushi Yamanaka<sup>2,3</sup>, Keigo Yato<sup>1</sup>, Kentaro Yoshii<sup>4</sup>, Koichi Watashi<sup>1</sup>, Hideki Aizaki<sup>1</sup>, Eiji Konishi<sup>2,3</sup>, Tomohiko Takasaki<sup>5</sup>, Takanobu Kato<sup>1</sup>, Masamichi Muramatsu<sup>1</sup>, Takaji Wakita<sup>1</sup>, Ryosuke Suzuki<sup>1\*</sup>

<sup>1</sup> Department of Virology II, National Institute of Infectious Diseases, 1-23-1, Toyama, Shinjuku-ku, Tokyo 162-8640, Japan

<sup>2</sup> BIKEN Endowed Department of Dengue Vaccine Development Faculty of Tropical Medicine, Mahidol University, 420/6 Ratchawithi Road, Ratchahewi, Bangkok 10440, Thailand

<sup>3</sup> BIKEN Endowed Department of Dengue Vaccine Development, Research Institute for Microbial Diseases, Osaka University, 3-1 Yamadaoka, Suita, Osaka 565-0871, Japan

<sup>4</sup> Laboratory of Public Health, Faculty of Veterinary Medicine, Hokkaido University, Kita 18, Nishi 9, Kita-ku, Sapporo 060-0818, Japan

<sup>5</sup> Kanagawa Prefectural Institute of Public Health, 1-3-1, Shimomachiya, Chigasaki, Kanagawa 253-0087, Japan

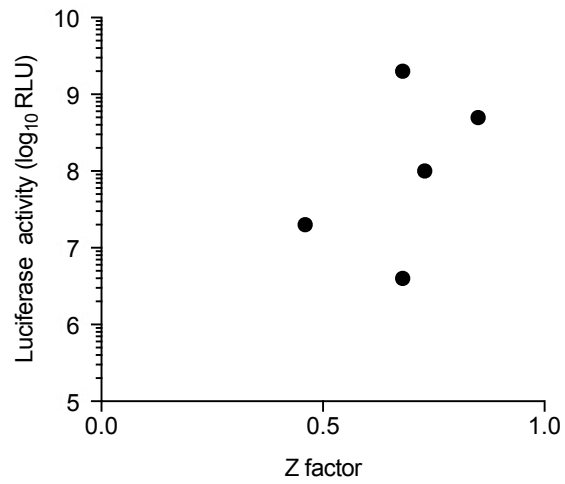

**Supplementary Figure 1.** Different infectious titers of WNV-SRIPs were inoculated with Vero cells, and luciferase activity of cells with or without infection was subsequently determined at 3 days post-infection. Luciferase activity and Z-factor were plotted.
